# Supplementary material for: Porous Biphasic Calcium Phosphate Granules from Oyster Shell Promote the Differentiation of Induced Pluripotent Stem Cells
Source: MDPI journal article supplement (doi:10.3390/ijms22179444), 2021-08-31
Supplement: s1 [file s1]

**Supporting information:**

## **Porous Biphasic Calcium Phosphate Granules from Oyster Shell Promote the Differentiation of Induced Pluripotent Stem Cells**

*Wen-Fu Ho<sup>1,\*</sup>, Mei-Hwa Lee<sup>2</sup>, James L. Thomas<sup>3</sup>, Jin-An Li<sup>1</sup>, Shih-Ching Wu<sup>4</sup>,  
Hsueh-Chuan Hsu<sup>4</sup>, and Hung-Yin Lin<sup>1,\*</sup>*

*<sup>1</sup>Department of Chemical and Materials Engineering, National University of Kaohsiung, Kaohsiung 81148,  
Taiwan*

*<sup>2</sup>Department of Materials Science and Engineering, I-Shou University, Kaohsiung 84001, Taiwan*

*<sup>3</sup>Department of Physics and Astronomy, University of New Mexico, Albuquerque, NM 87131, USA*

*<sup>4</sup>Department of Dental Technology and Materials Science, Central Taiwan University of Science and  
Technology, Taichung 40601, Taiwan*

\* To whom correspondence should be addressed:  
Department of Chemical and Materials Engineering,  
National University of Kaohsiung (NUK),  
700, Kaohsiung University Rd.,  
Nan-Tzu District, Kaohsiung 811, Taiwan  
Tel: (O) +886(7)591-9455; (M) +886(912)178-751  
E-Mail: [linhy@ntu.edu.tw](mailto:linhy@ntu.edu.tw) or [linhy@caa.columbia.edu](mailto:linhy@caa.columbia.edu)

**Table S1.** The sequence (5' - 3') of primers for GAPDH, OCT4, SOX2, c-Myc, KLF4, Akt1, Akt2,  $\beta$ -catenin, STAT3, NANOG, HRAS, KRAS, NRAS, ERK1, and ERK2.

| mRNA             | Forward/Reverse | Sequence (5' - 3')           |
|------------------|-----------------|------------------------------|
| GAPDH            | forward         | ACAGTTGCCATGTAGACC           |
|                  | reverse         | TTTTTGGTTGAGCACAGG           |
| Akt1             | forward         | AAGTACTCTTTCCAGACCC          |
|                  | reverse         | TTCTCCAGCTTGAGGTC            |
| $\beta$ -catenin | forward         | CAACTAAACAGGAAGGGATG         |
|                  | reverse         | CACAGGTGACCACATTTATATC       |
| NANOG            | forward         | CCAGAACCAGAGAATGAAATC        |
|                  | reverse         | TGGTGGTAGGAAGAGTAAAG         |
| OCT4             | forward         | GACAGGGGGAGGGGAGGAGCTAGG     |
|                  | reverse         | CTTCCCTCCAACCAGTTGCCCAAAC    |
| SOX2             | forward         | GGGAAATGGGAGGGGTGCAAAAGAGG   |
|                  | reverse         | TTGCGTGAGTGTGGATGGGATTGGTG   |
| KLF4             | forward         | ACGATCGTGGCCCCGGAAAAGGACC    |
|                  | reverse         | TGATTGTAGTGCTTTCTGGCTGGGCTCC |
| STAT3            | forward         | GGTACATCATGGGCTTTATC         |
|                  | reverse         | TTTGCTGCTTTCACTGAATC         |
| p53              | forward         | AGGCAGTCAGATCATCTTC          |
|                  | reverse         | TTATCTCTCAGCTCCACG           |
| HRas             | forward         | ACCATTTTGTGGACGAATAC         |
|                  | reverse         | AAGACTTGGTGTTGTTGATG         |
| KRas             | forward         | GCCTGCTGAAAATGACTG           |
|                  | reverse         | TCCTGAAGGAATCCTCTATTG        |
| NRas             | forward         | AGTTTTGTCAGAAAAGAGCC         |
|                  | reverse         | CTAAACTACTGAGAGCTGGG         |
| Erk1             | forward         | TTCGAACATCAGACCTACTG         |
|                  | reverse         | TAGACATCTCTCATGGCTTC         |
| Erk2             | forward         | GAAGCATTATCTTGACCAGC         |
|                  | reverse         | TCCATGGCACCTTATTTTTG         |

**Table S2.** The sequence (5'- 3') of primers for MKK6, MAPK11, MAPK12, MAPK13, MAPK14, RAC1, CDC42, c-Abl, TAK1, MKK3, SMAD2, SMAD3, SMAD4, SMAD1, SMAD5, SMAD8, LIMK1, and PKC.

| Marker | Forward                | Reverse                |
|--------|------------------------|------------------------|
| Smad2  | AGTGTGTAAAATTCCACCAG   | ATTCTAGTTAGCTGATAGACGG |
| Smad3  | CTACCAGAGAGTAGAGACAC   | TCTCTGGAATATTGCTCTGG   |
| Smad4  | AAAGGTCTTTGATTTGCGTC   | CTATTCACCTACTGATCCTG   |
| Smad1  | GGCATATTGGAAAAGGAGTTC  | AGATGCTACTGTCACTAAGG   |
| Smad5  | CCAGTCTTACCTCCAGTATTAG | TCCTAAACTGAACCAGAAGG   |
| Smad8  | CCTATCCTGACTCTTTCCAG   | AACTGAGTGTGATAGGGAC    |
| TAK1   | CCCAGTGTGAGAATGATTAC   | TATCTGTGGAATCATCAGGG   |
| MKK3   | CACTATTCAGAGAGGGAGAC   | GTTTTTATCCAGCACCTTCC   |
| MKK6   | CATCTTGATTCCCTGAAAGTC  | CCTTTCGACTGAGACATTTTC  |
| MAPK11 | TCAACTGGATGCATTACAAC   | GAGGAGATTTTTTGCCAGAAC  |
| MAPK12 | AAGGAGATCATGAAGGTGAC   | GTCAGGATAGAGGCAAAATC   |
| MAPK13 | GAAGATTCTGGATTTTGGGC   | CTTGAACAGAGTTTTCCCTG   |
| MAPK14 | AGATTCTGGATTTTGGACTG   | CCACTGACCAAATATCAACTG  |
| Rac1   | TTGGTGCTGTAAAATACCTG   | GGCATTTTCTCTTCCTCTTC   |
| Cdc42  | GAACAAACAGAAGCCTATCAC  | TTTAGGCCTTTCTGTGTAAG   |
| c-Abl  | CTCAGACGAAGTGGAAAAG    | GAGTGAGGCATCTCAGG      |
| PKC    | CCAAAGTGTGTGGCAAAG     | TCAGACTGGTCTATGTTAGC   |
| LIMK1  | TTCTCAAGGAGGTGAAG      | TTGATGTACTCAGTGATGAAG  |

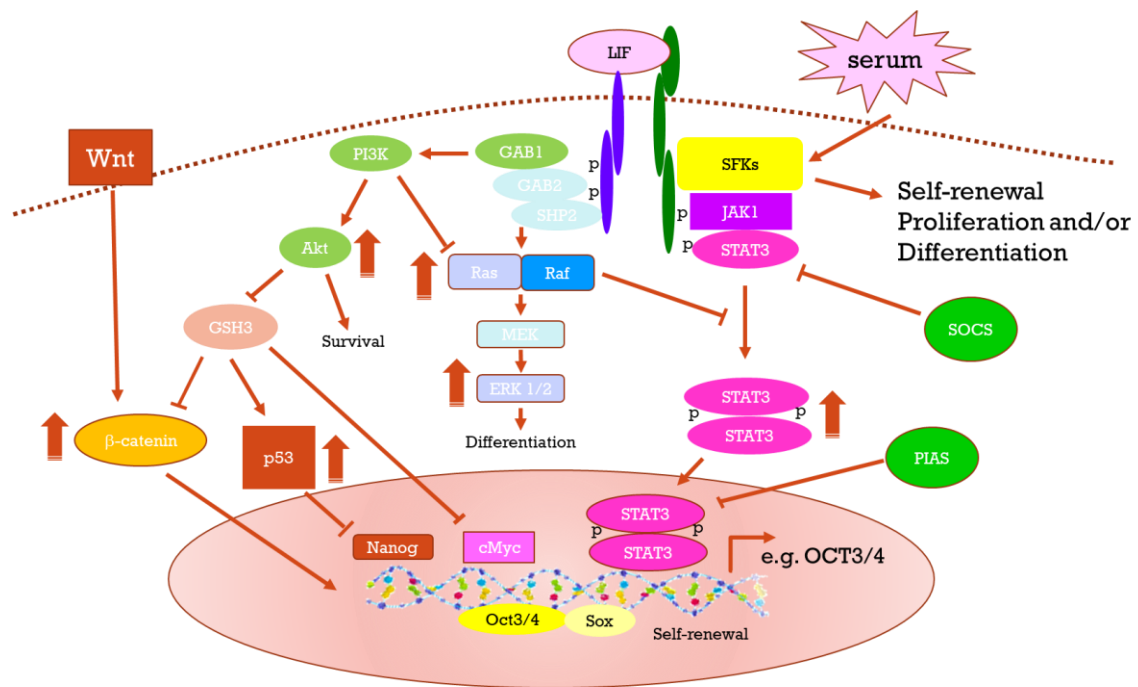

**Scheme S1.** Signaling of self-renewal or differentiation, and arrows indicate the increase of gene expression with incubation of porous biphasic calcium phosphate granules.

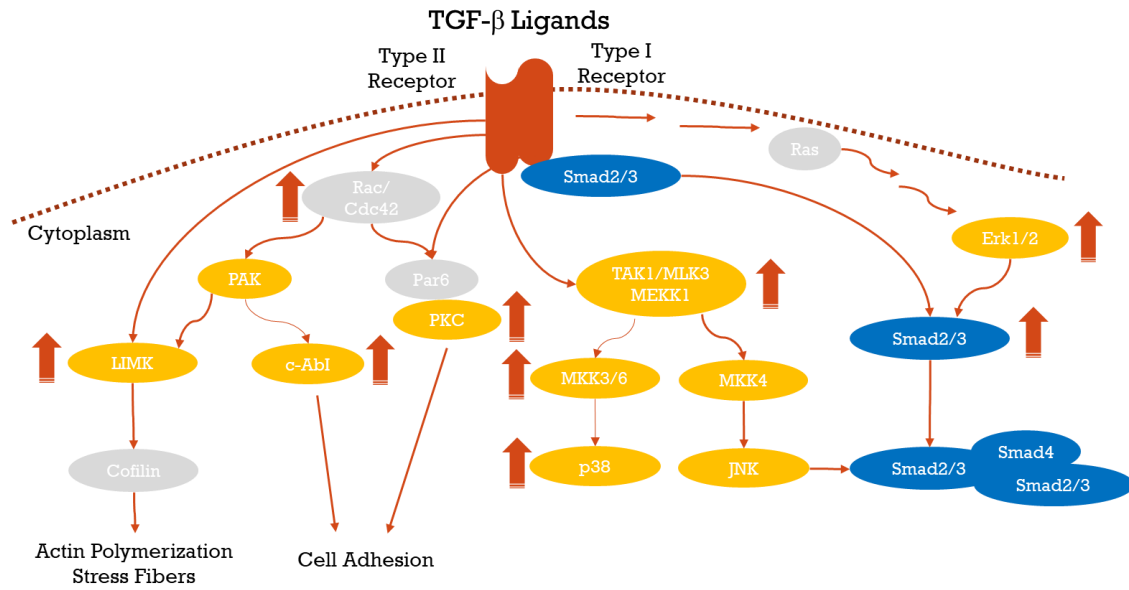

**Scheme S2.** The transforming growth factor *beta* (TGF- $\beta$ ) signaling in bone [30], and arrows indicate the increase of gene expression with incubation of porous biphasic calcium phosphate granules.

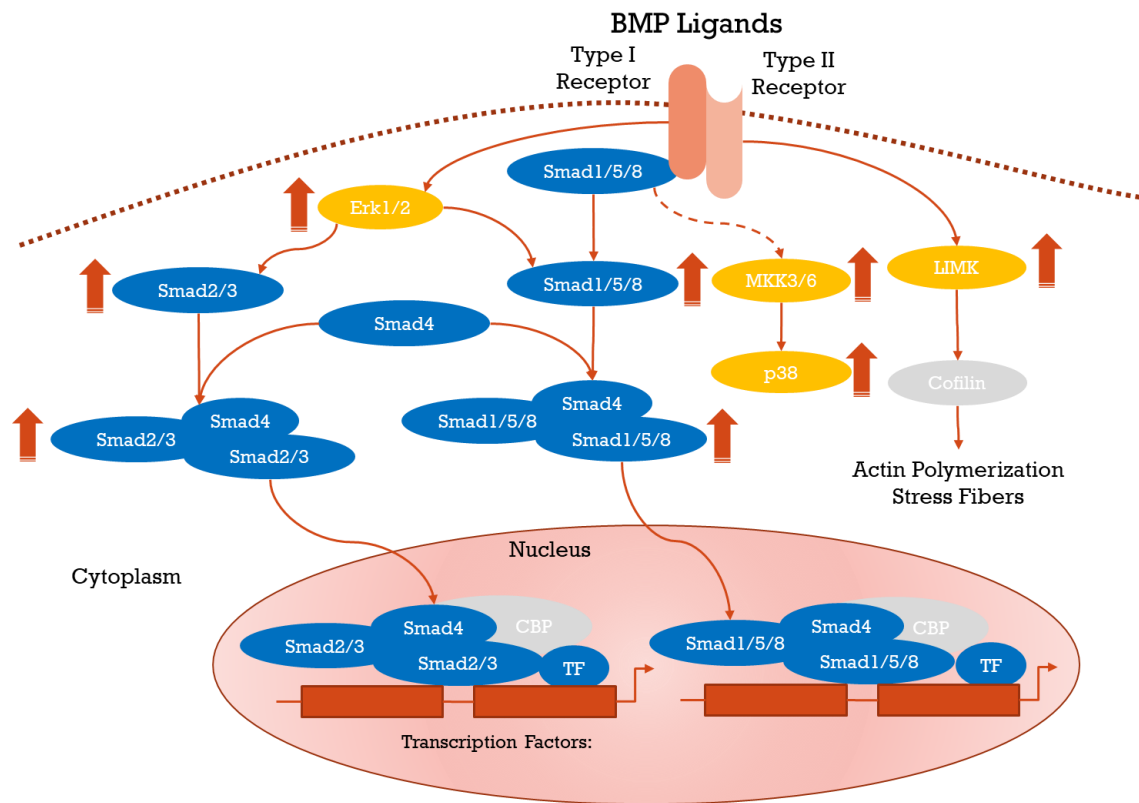

**Scheme S3.** The bone morphogenetic protein (BMP) signaling in bone [30], and arrows indicate the increase of gene expression with incubation of porous biphasic calcium phosphate granules.
